# Supplementary material for: Human Cytomegalovirus UL23 Antagonizes the Antiviral Effect of Interferon-γ by Restraining the Expression of Specific IFN-Stimulated Genes
Source: MDPI journal article supplement (doi:10.3390/v15041014), 2023-04-20
Supplement: s1 [file s1]

A

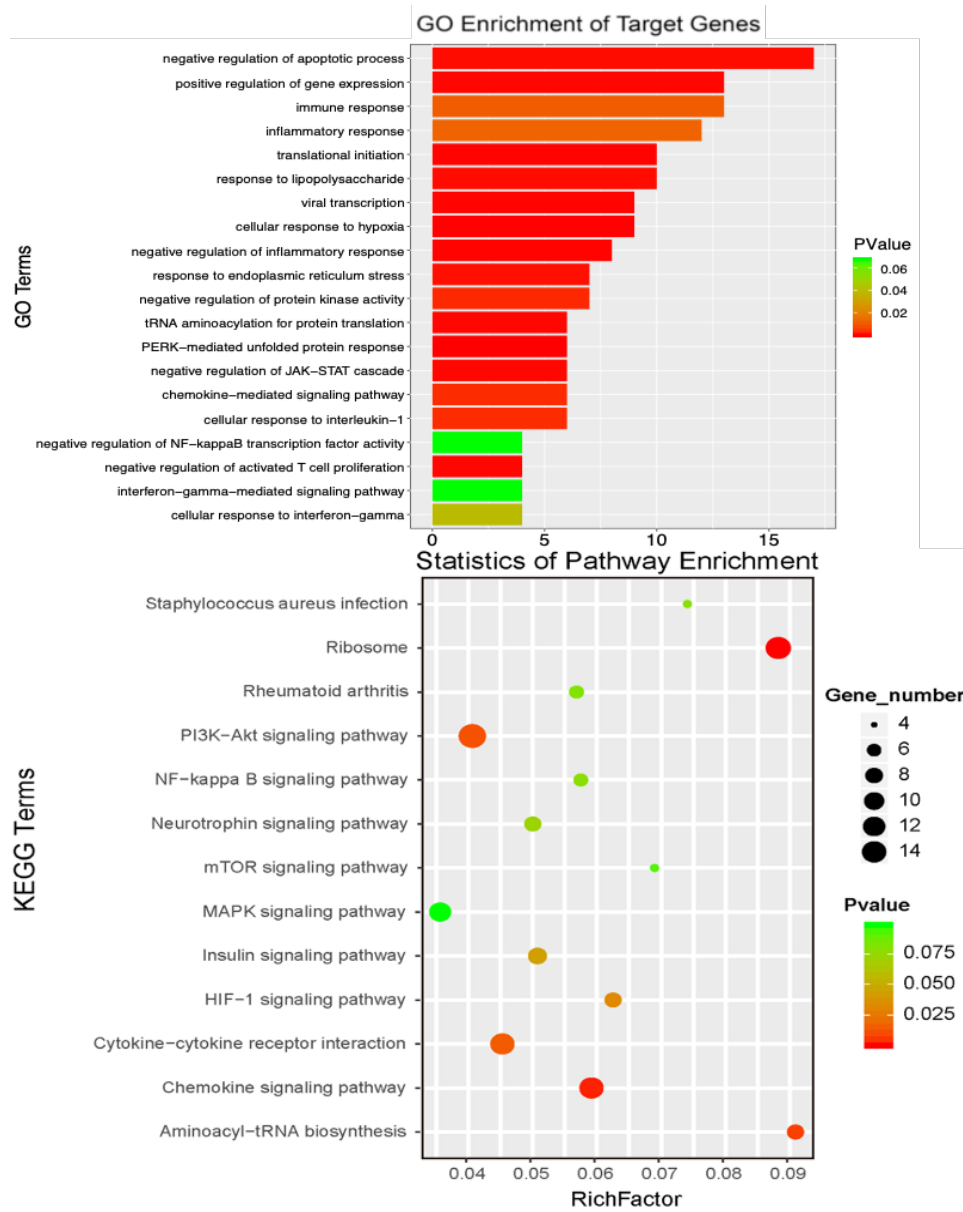

B

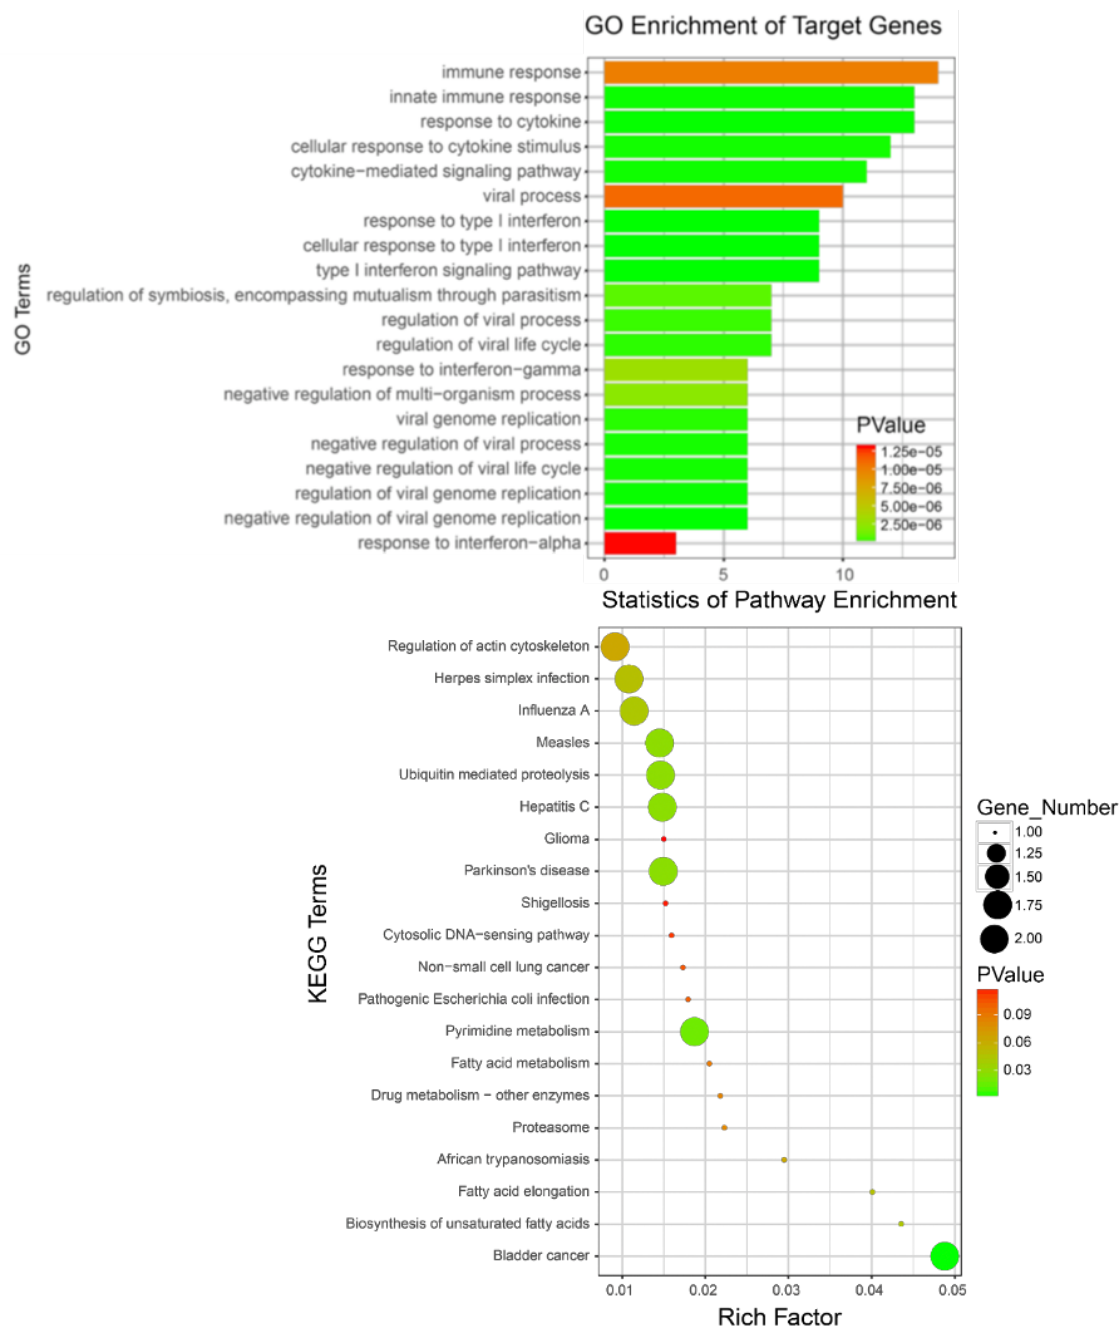

Figure S1. KEGG pathway enrichment and GO analysis of the differential genes regulated by UL23. (A) Used DAVID6.8 to conduct GO analysis and KEGG pathway enrichment analysis on differentially expressed genes in HFF-Vector-IFN- $\gamma$  group and HFF-UL23-IFN- $\gamma$  group. (B) Used DAVID6.8 to conduct GO analysis and KEGG pathway enrichment analysis on differentially expressed genes in HCMV-Towne group and HCMV-Towne- $\Delta$ UL23 group.

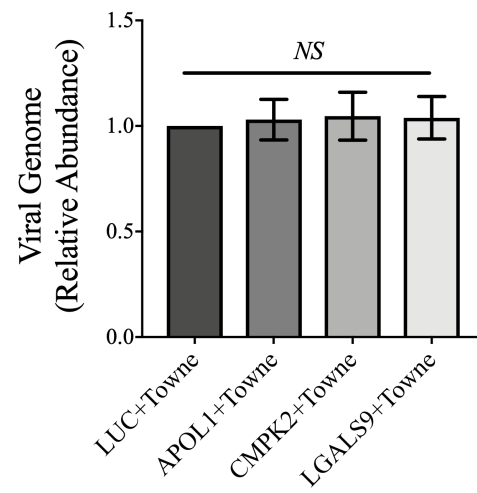

Figure S2. The effect of APOL1, CMPK2, and LGALS9 on HCMV entry into cells. HFF cells were infected with HCMV-Towne at an MOI of 1. Cells were harvested at 4 h and the relative number of viral genomes was determined by qPCR using primers to the UL83 gene region.
